# Supplementary material for: The complete mitochondrial genomes of five longicorn beetles (Coleoptera: Cerambycidae) and phylogenetic relationships within Cerambycidae
Source: PubMed Central journal article supplement (PMC6732212; doi:10.7717/peerj.7633), 2019-09-05

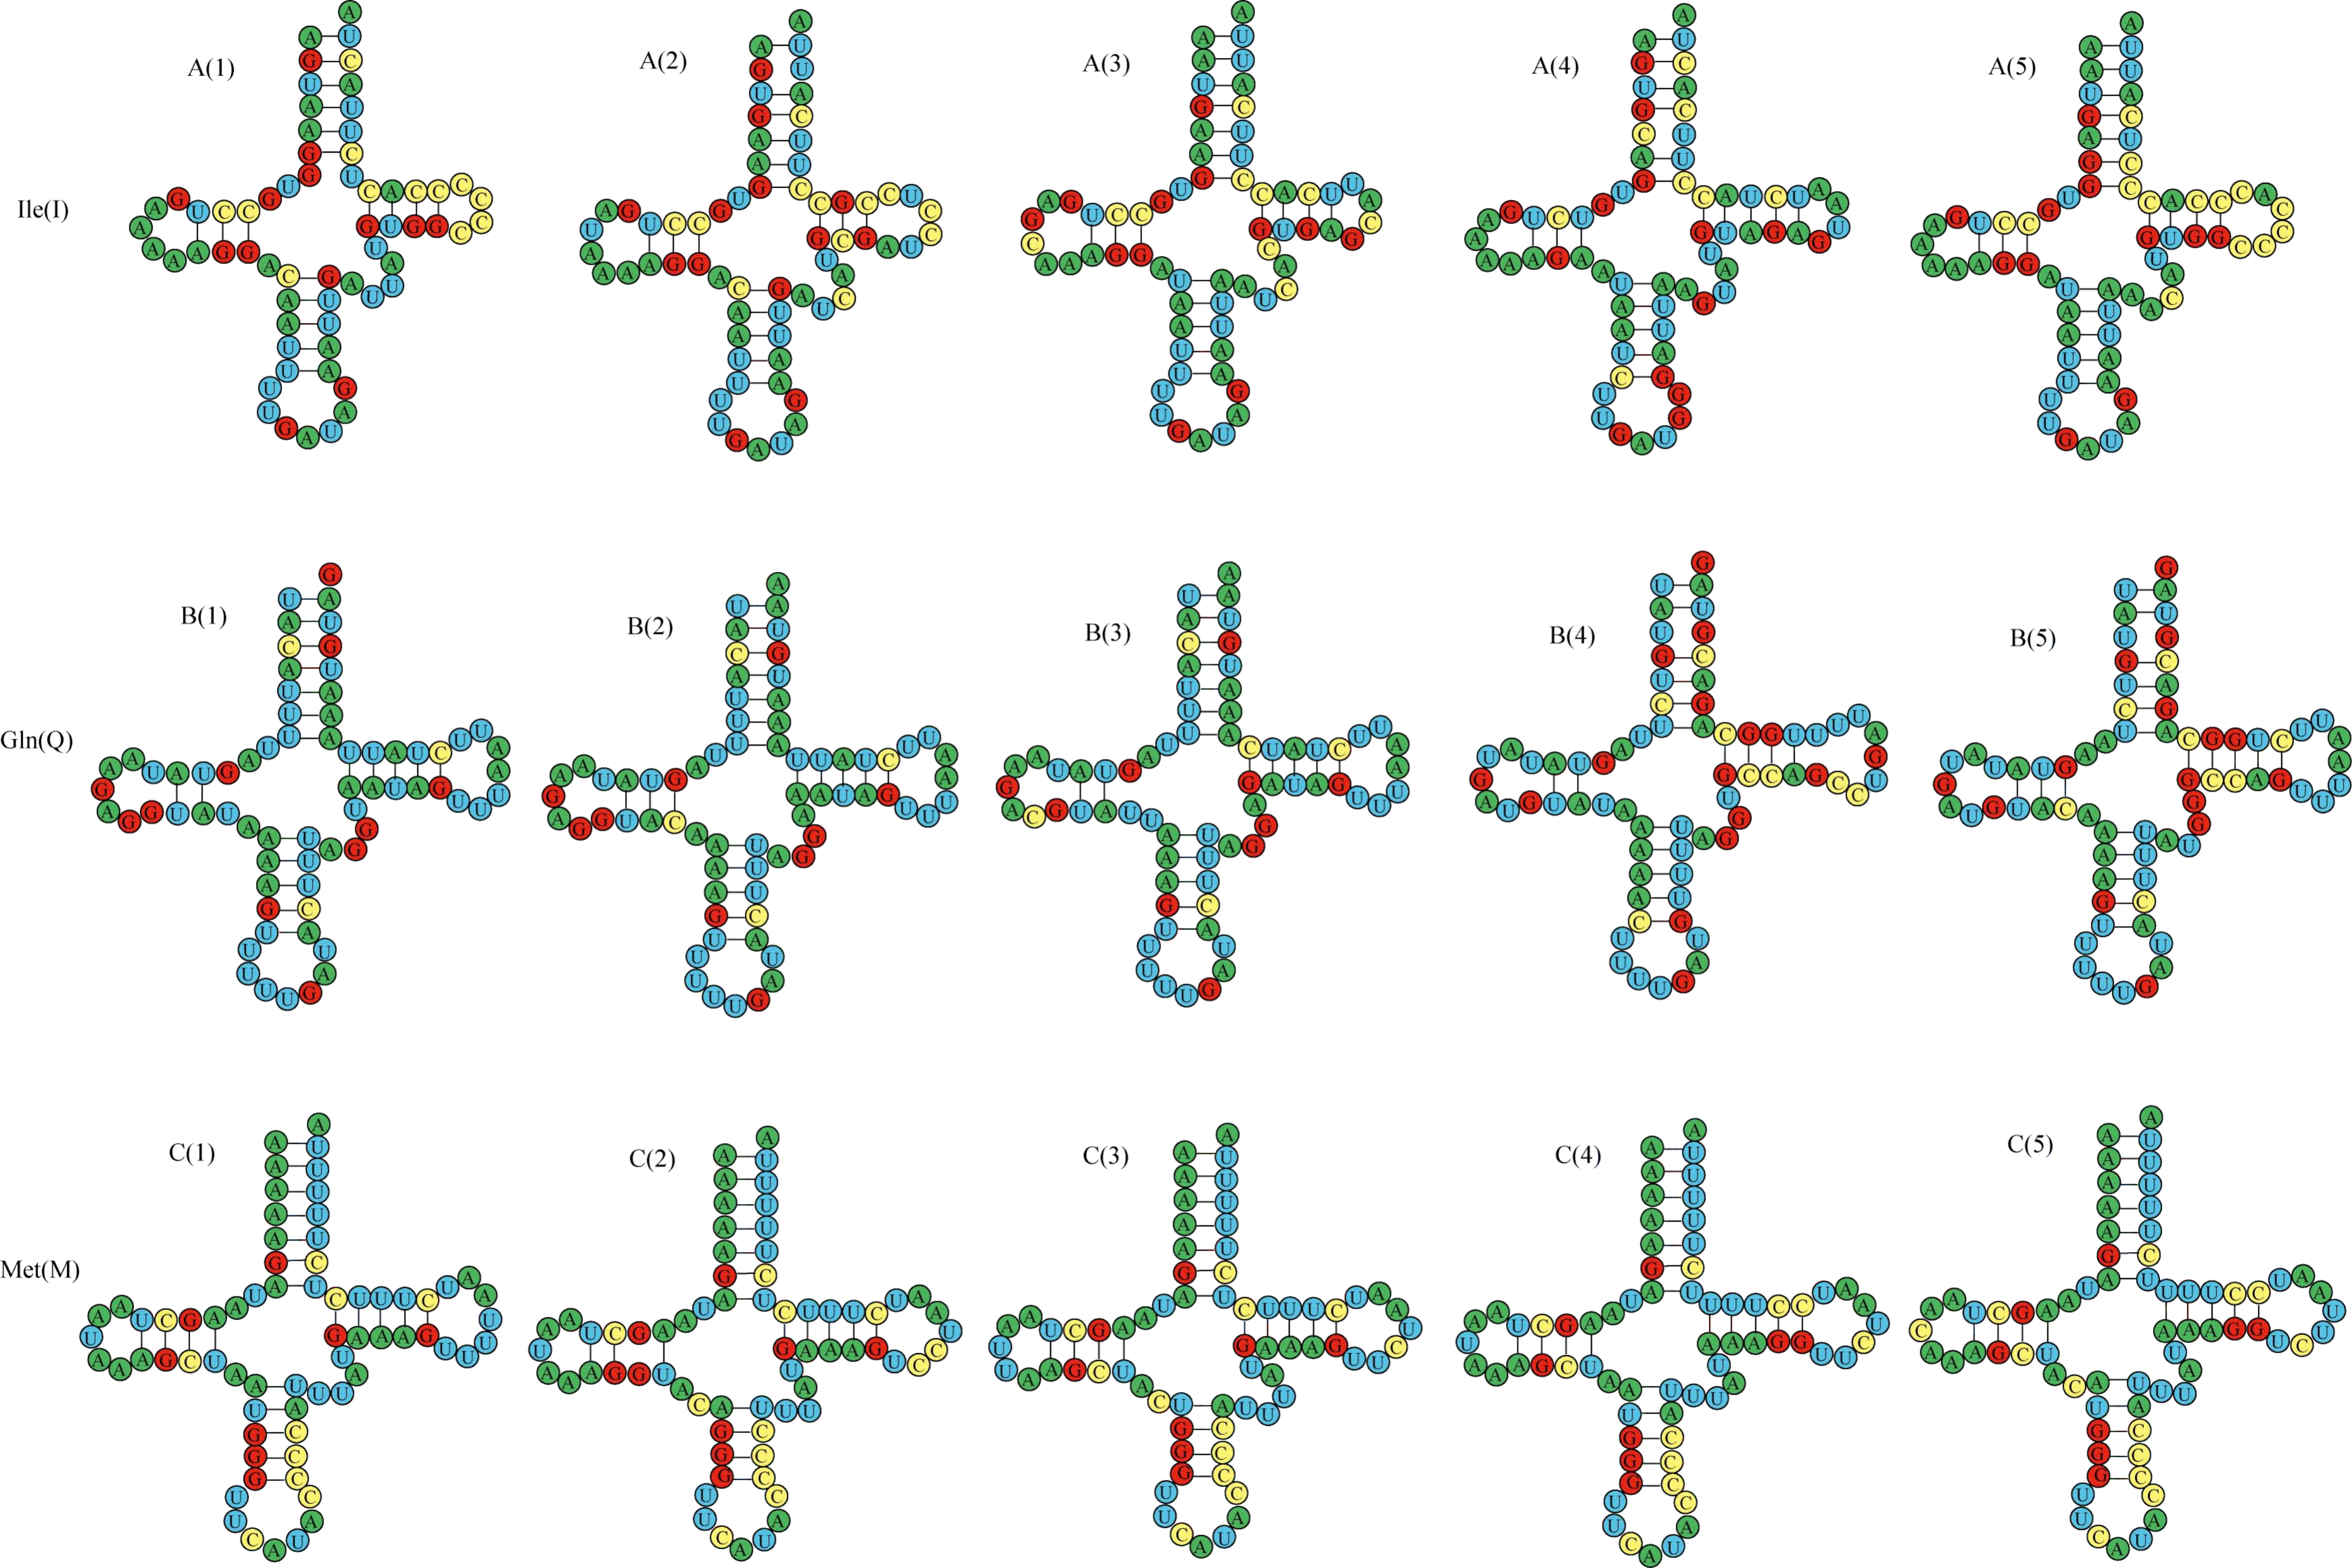



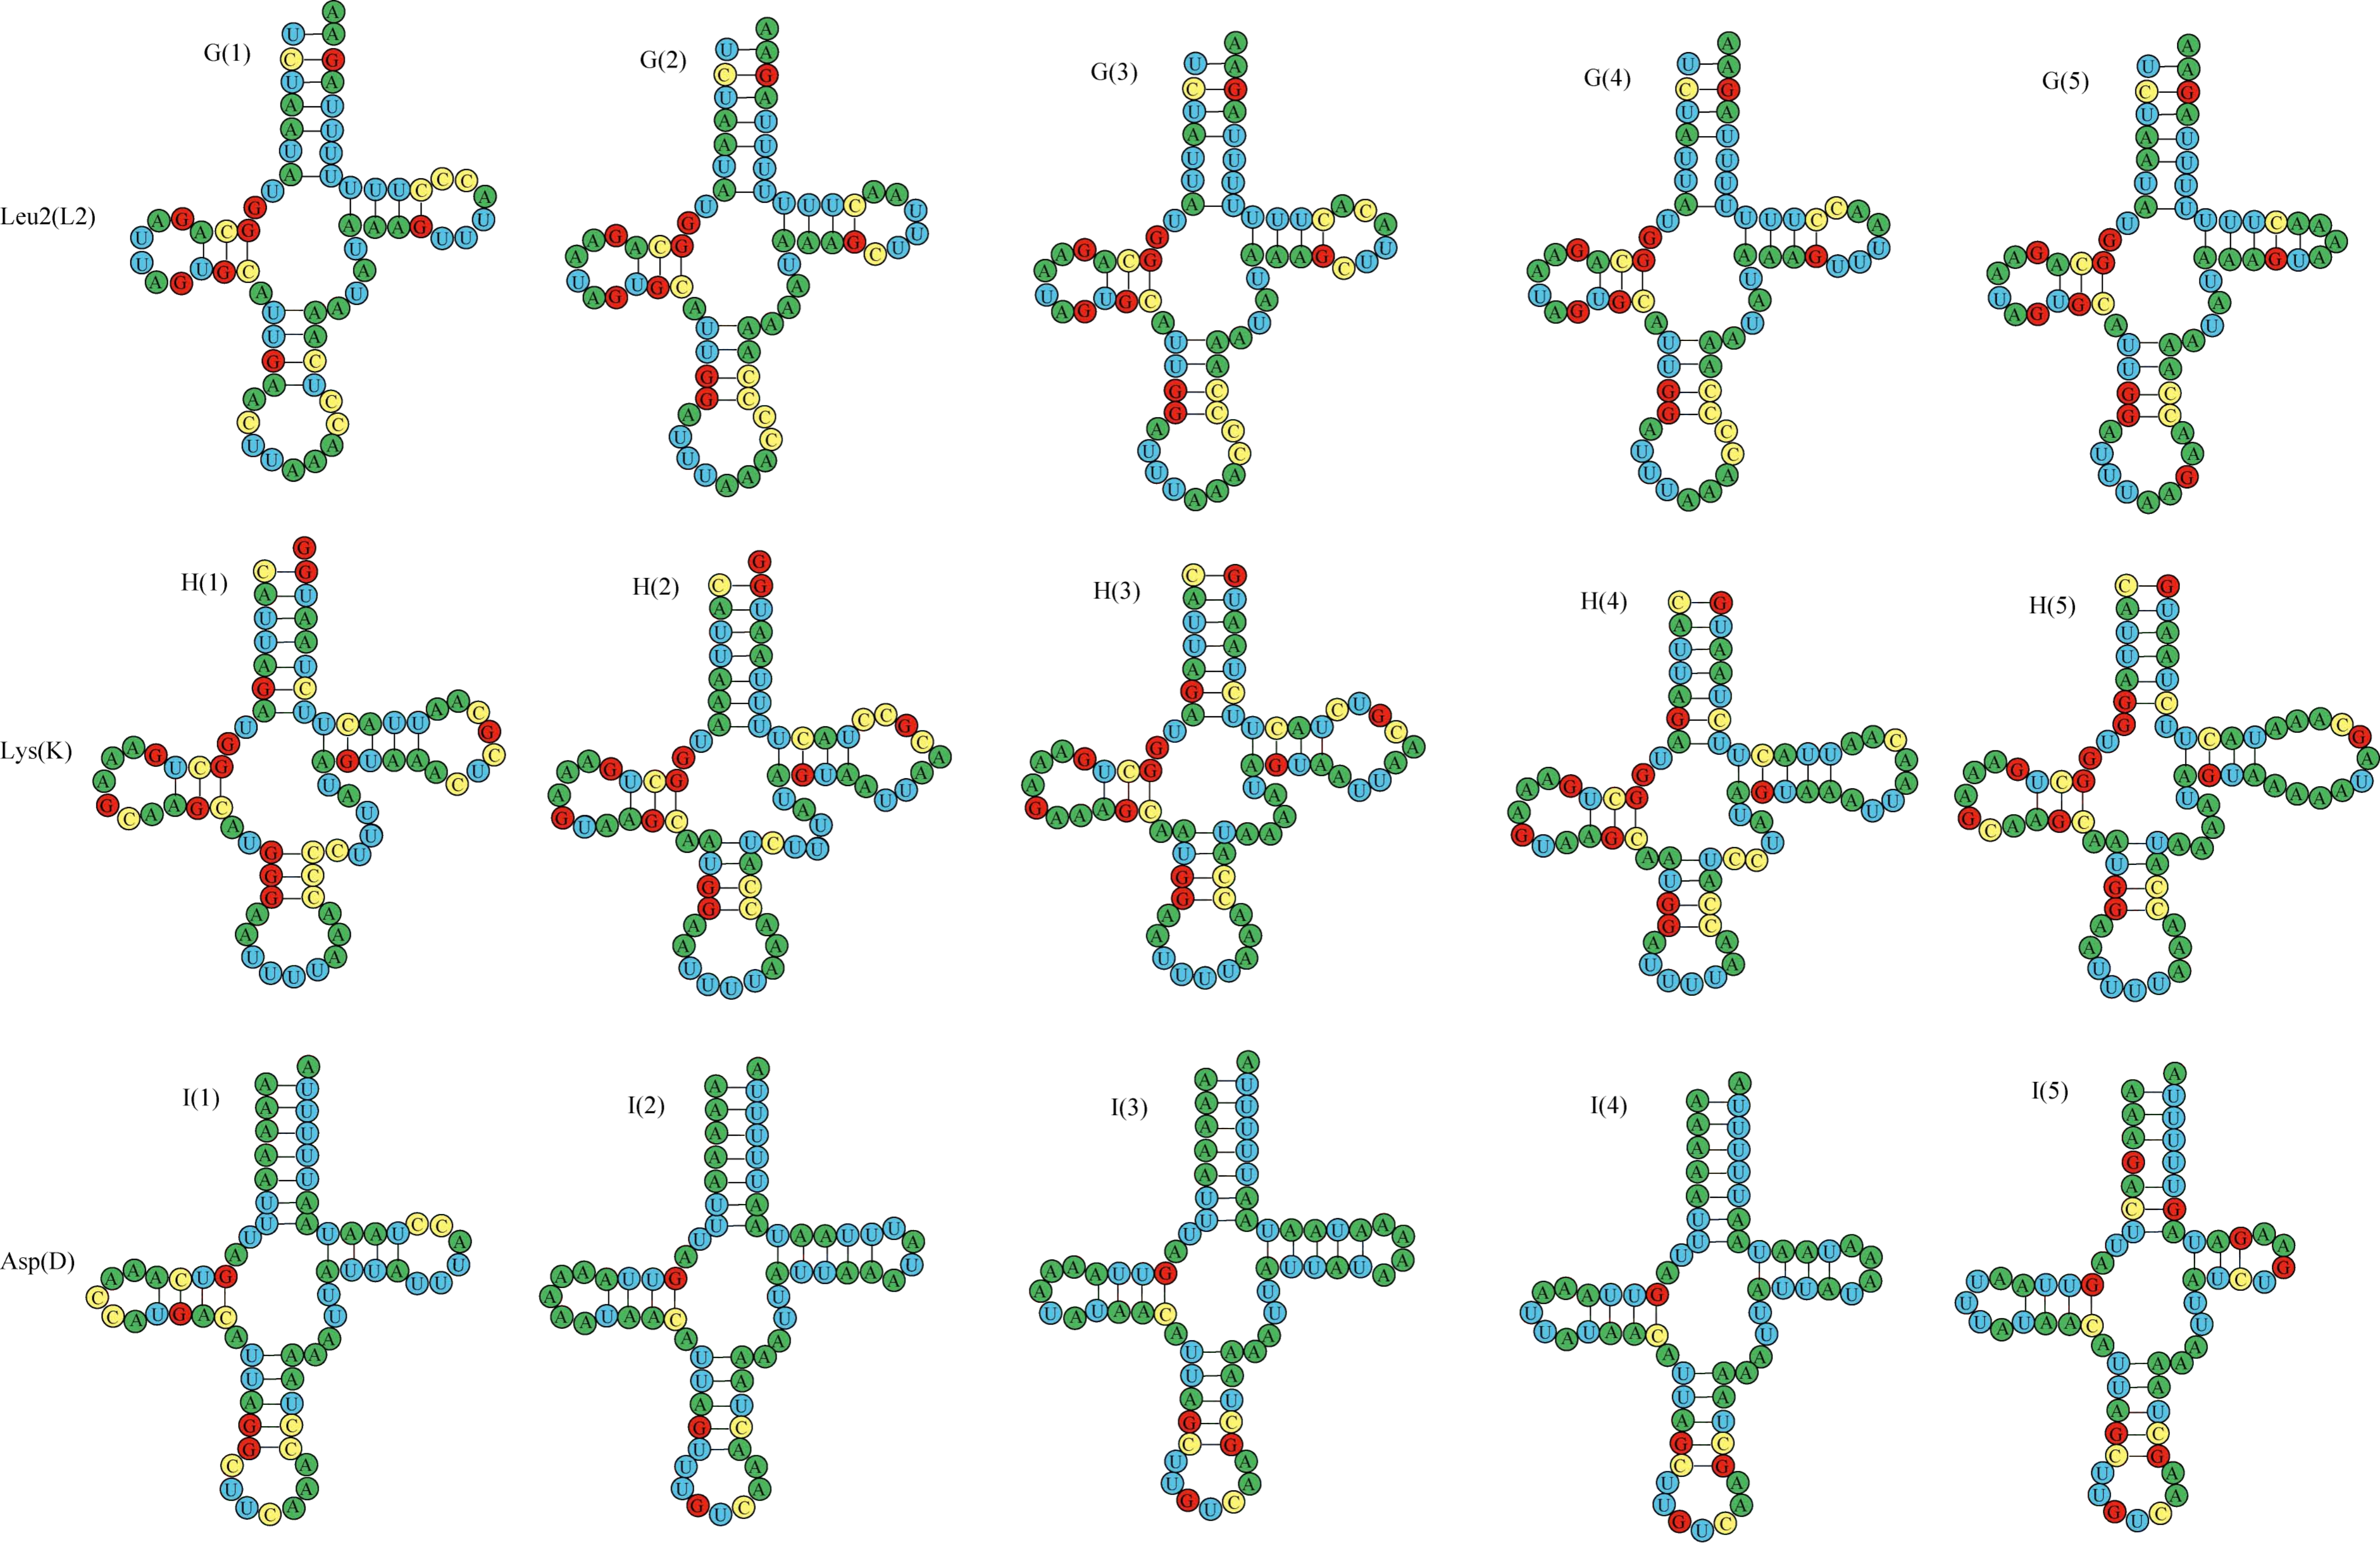

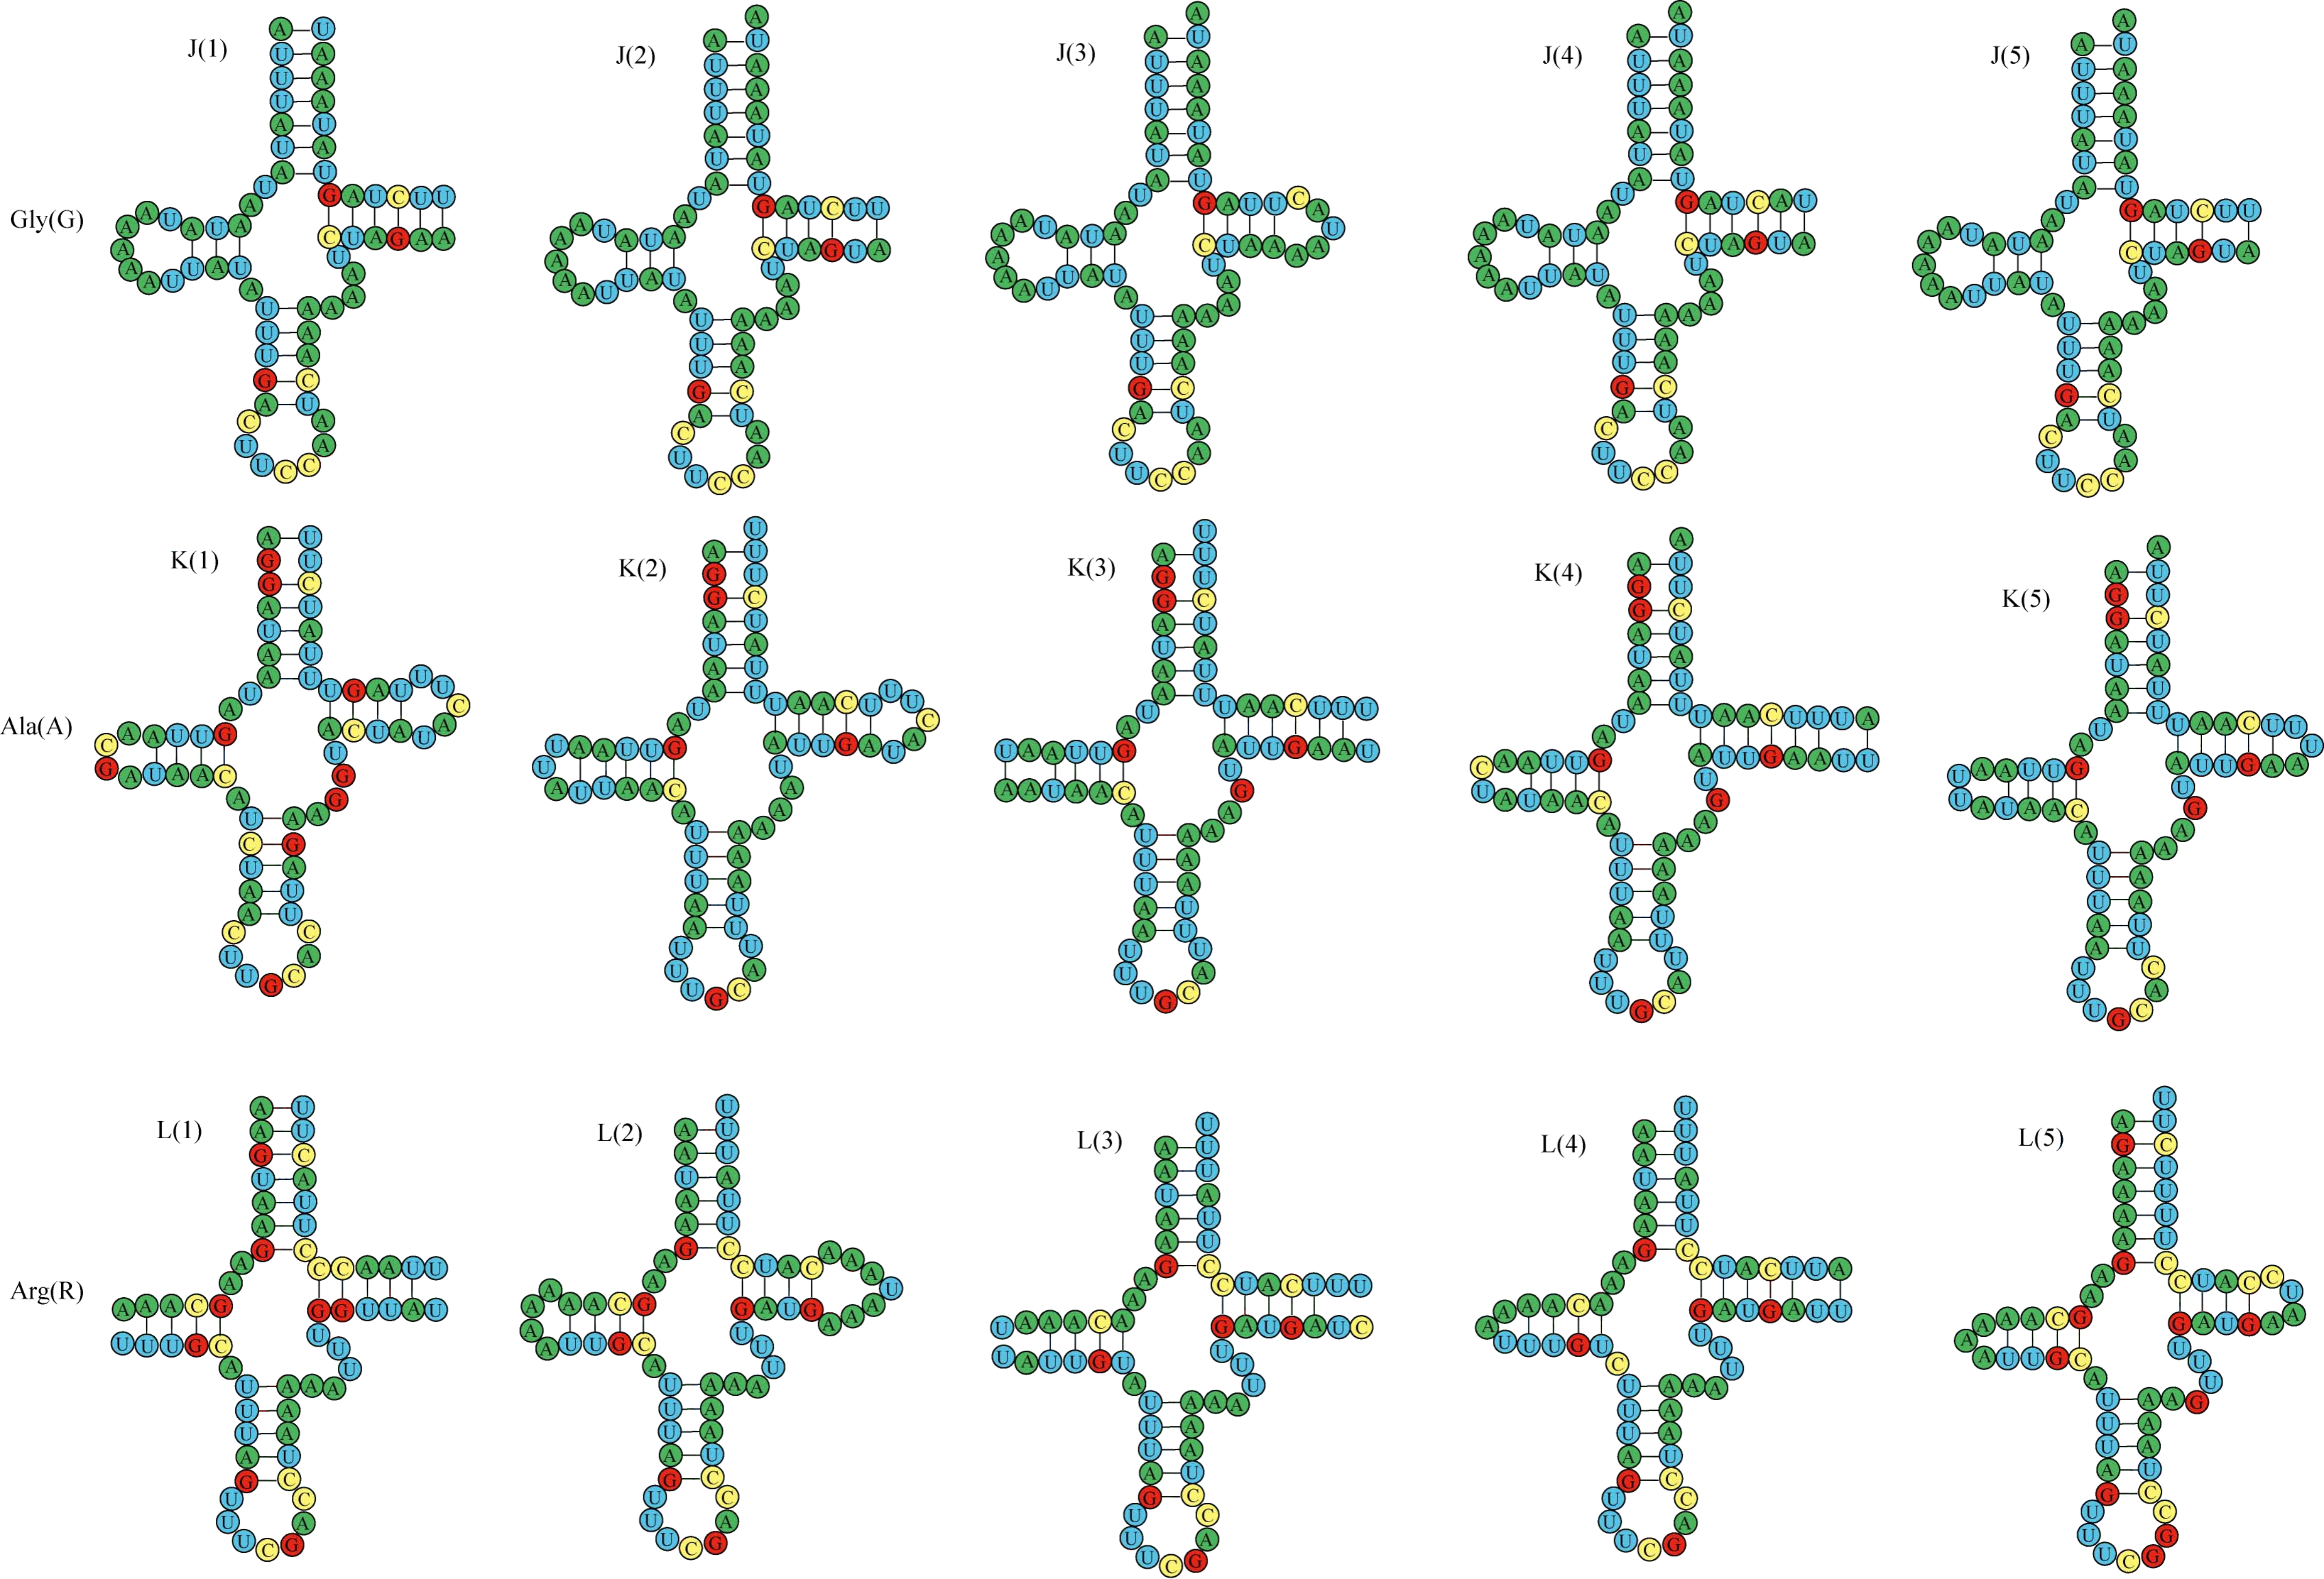

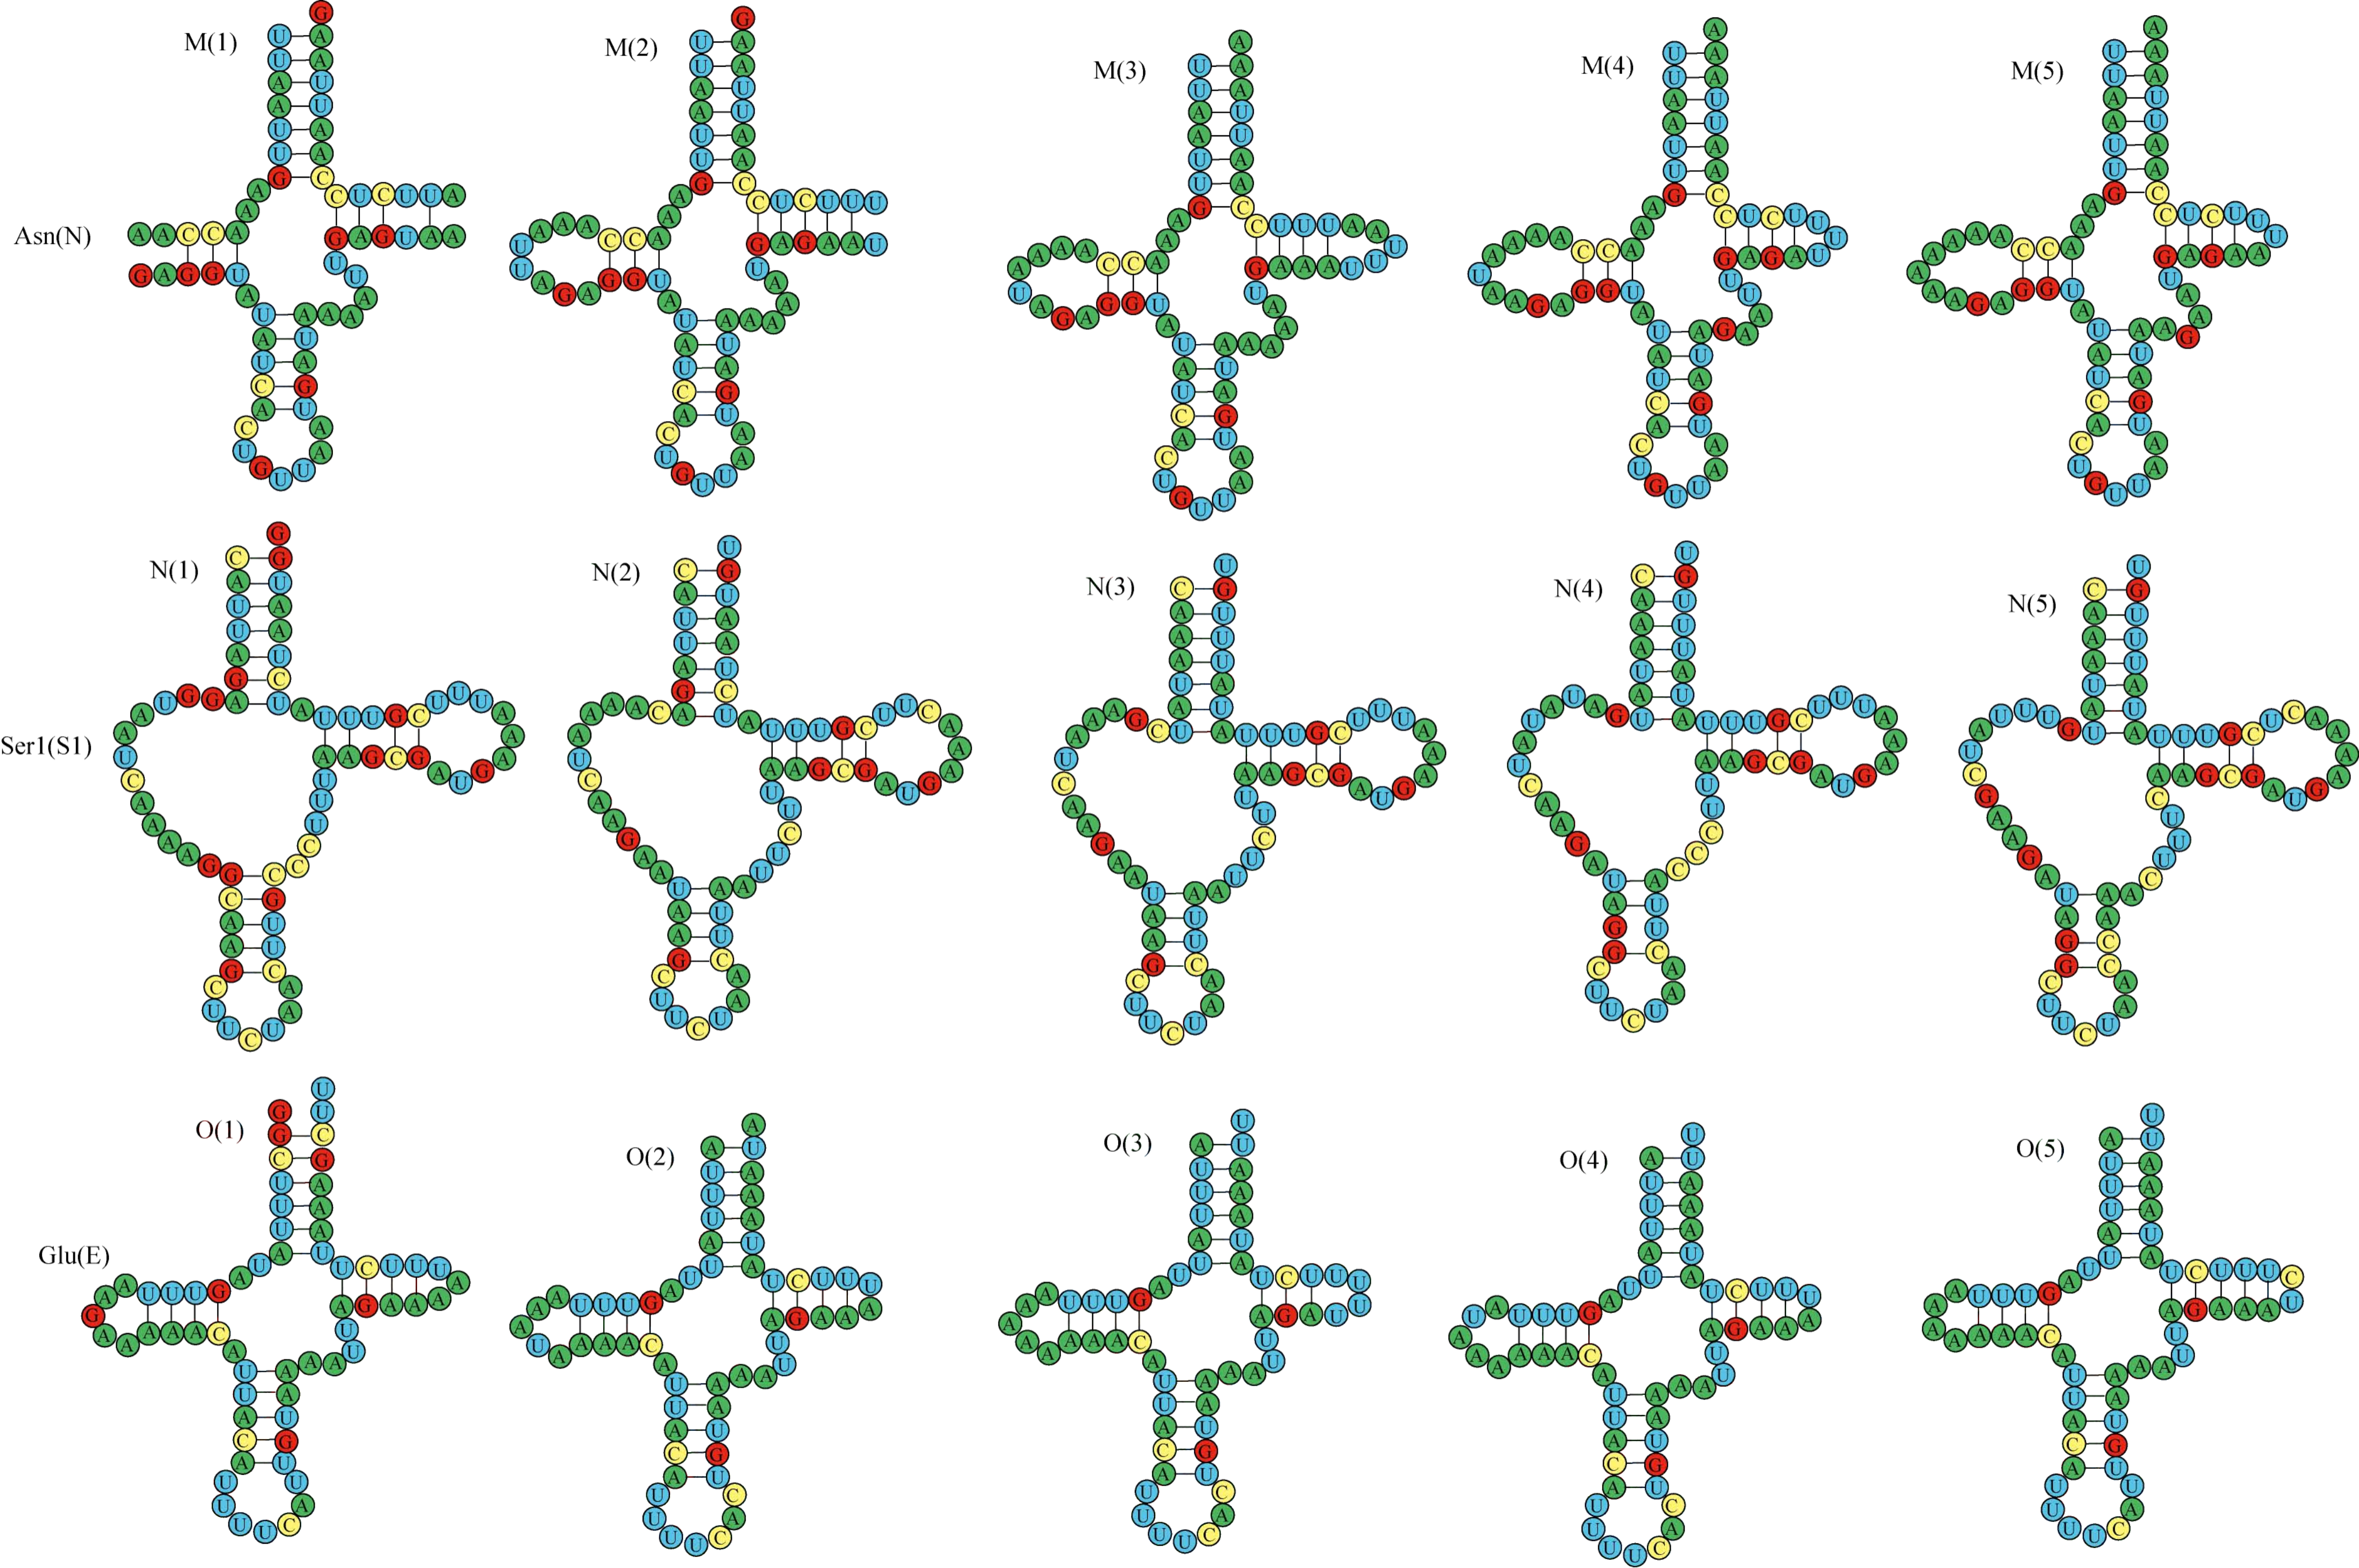

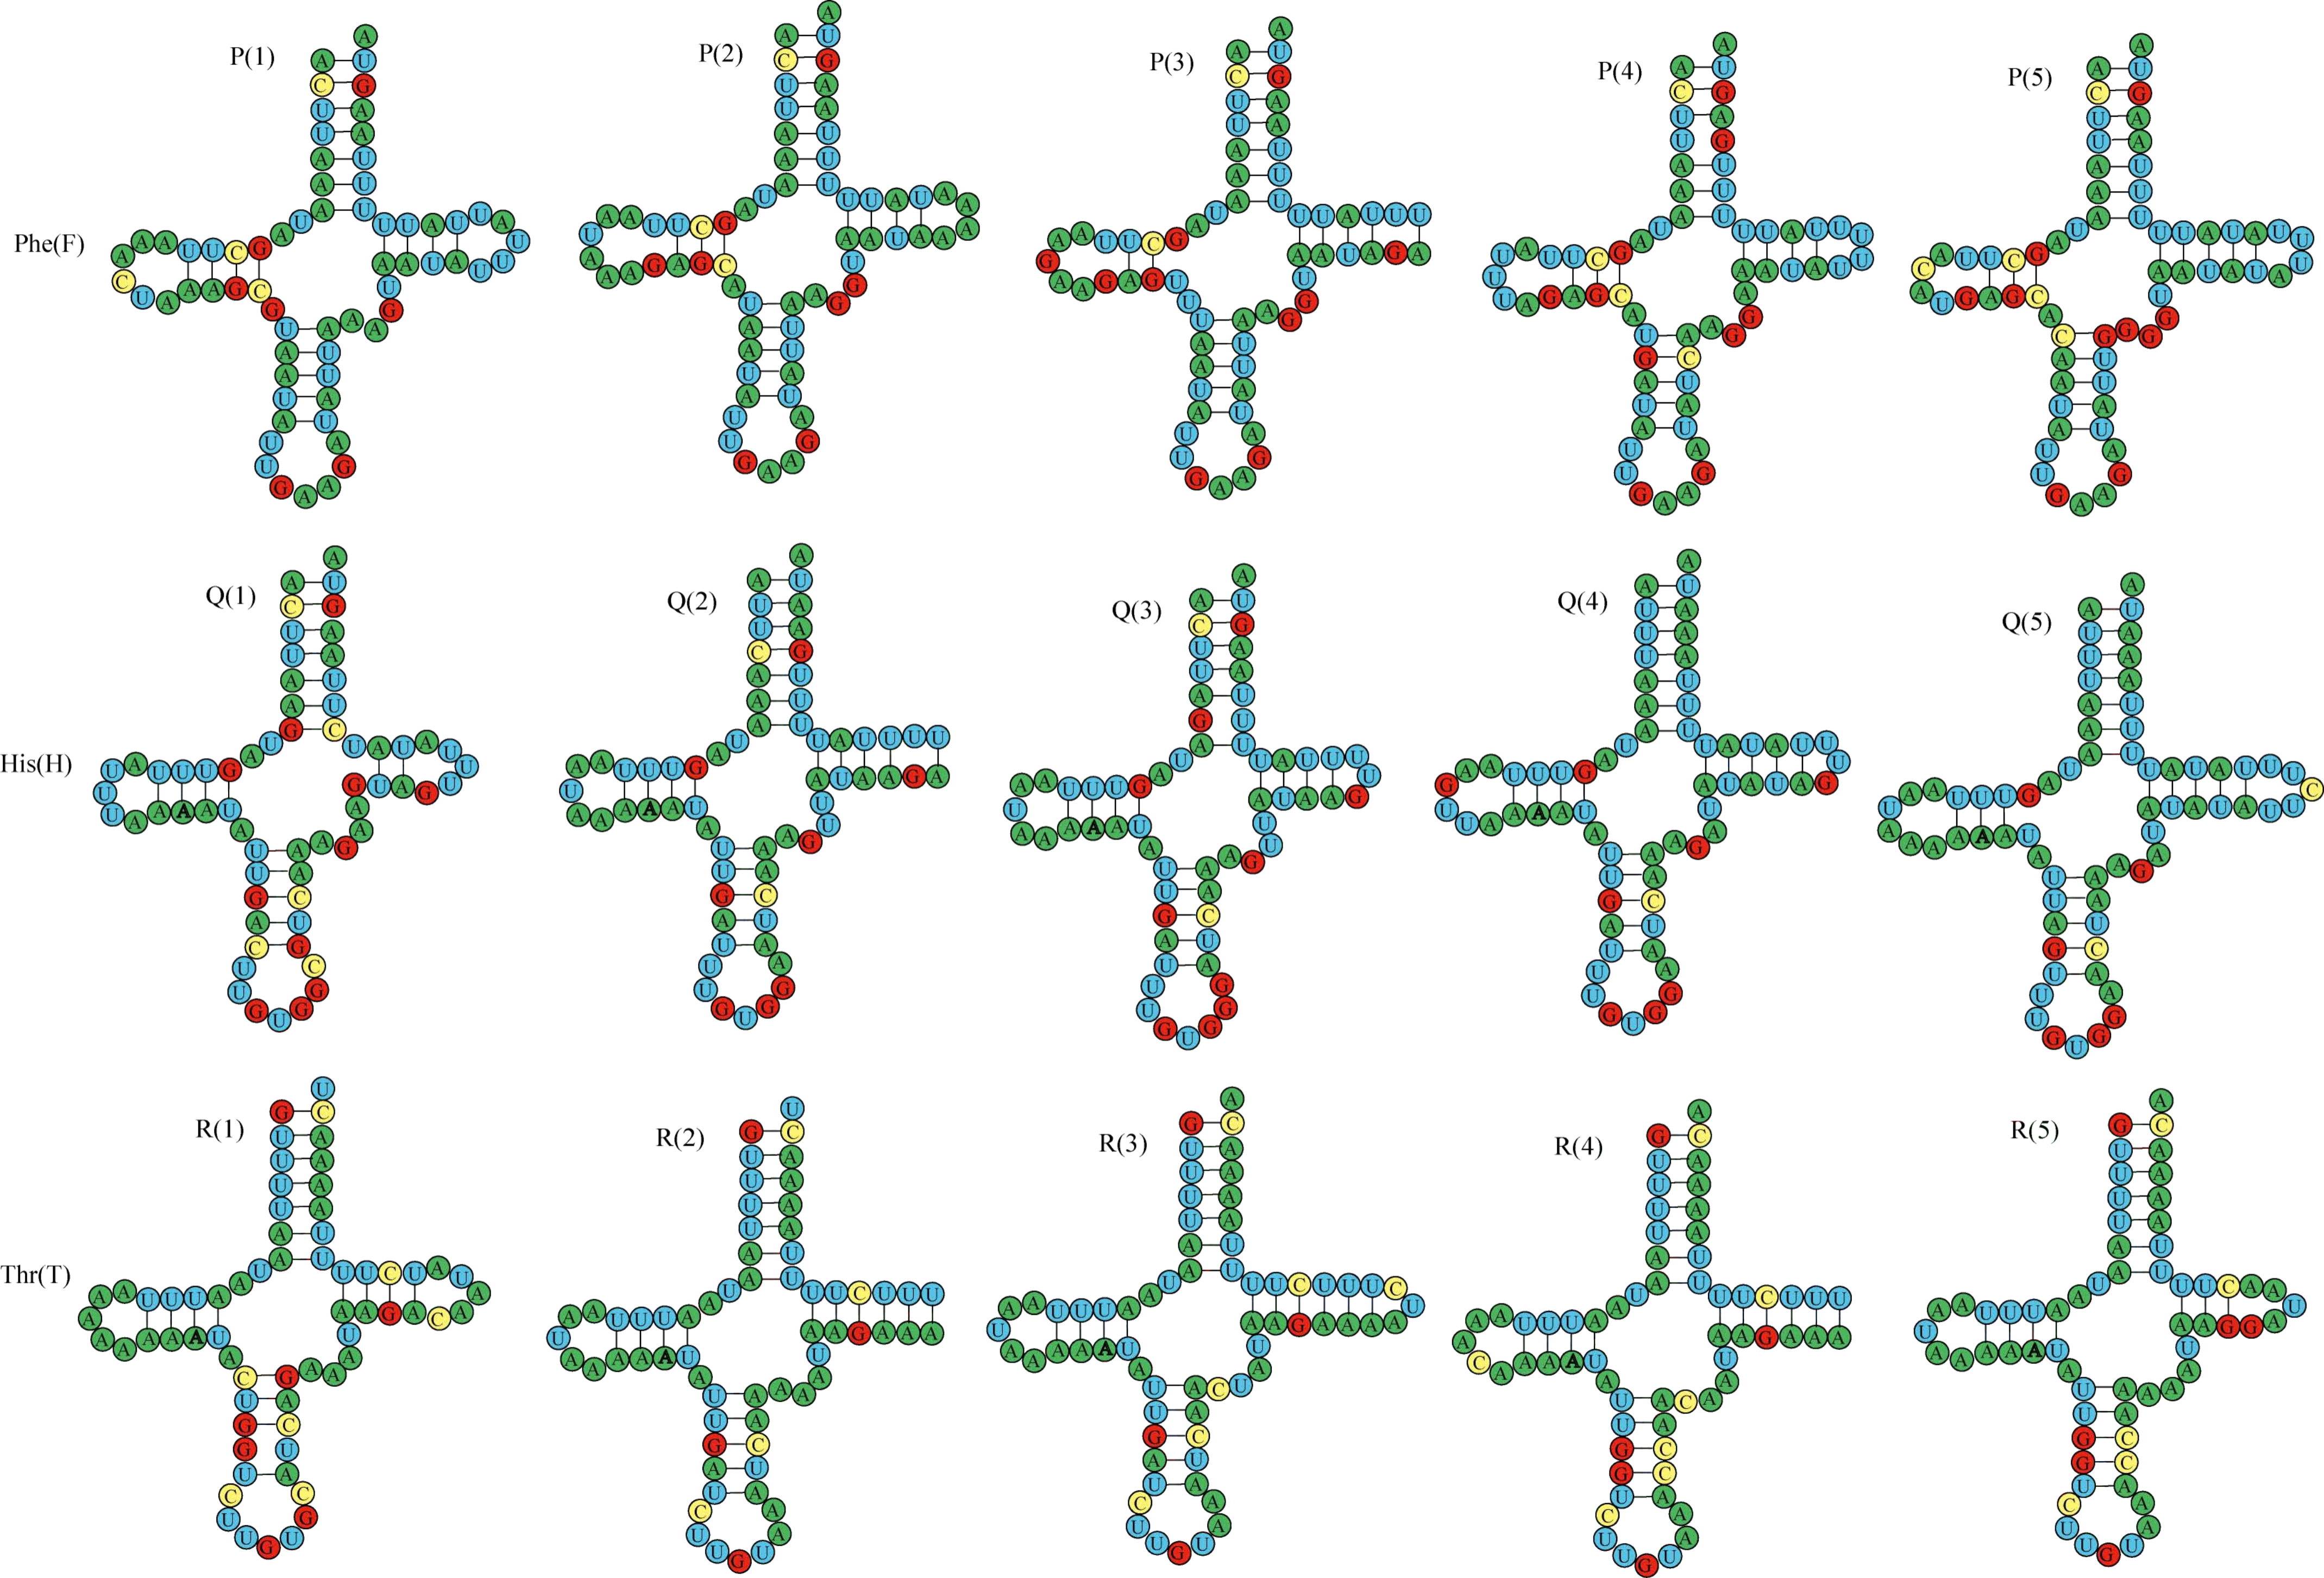

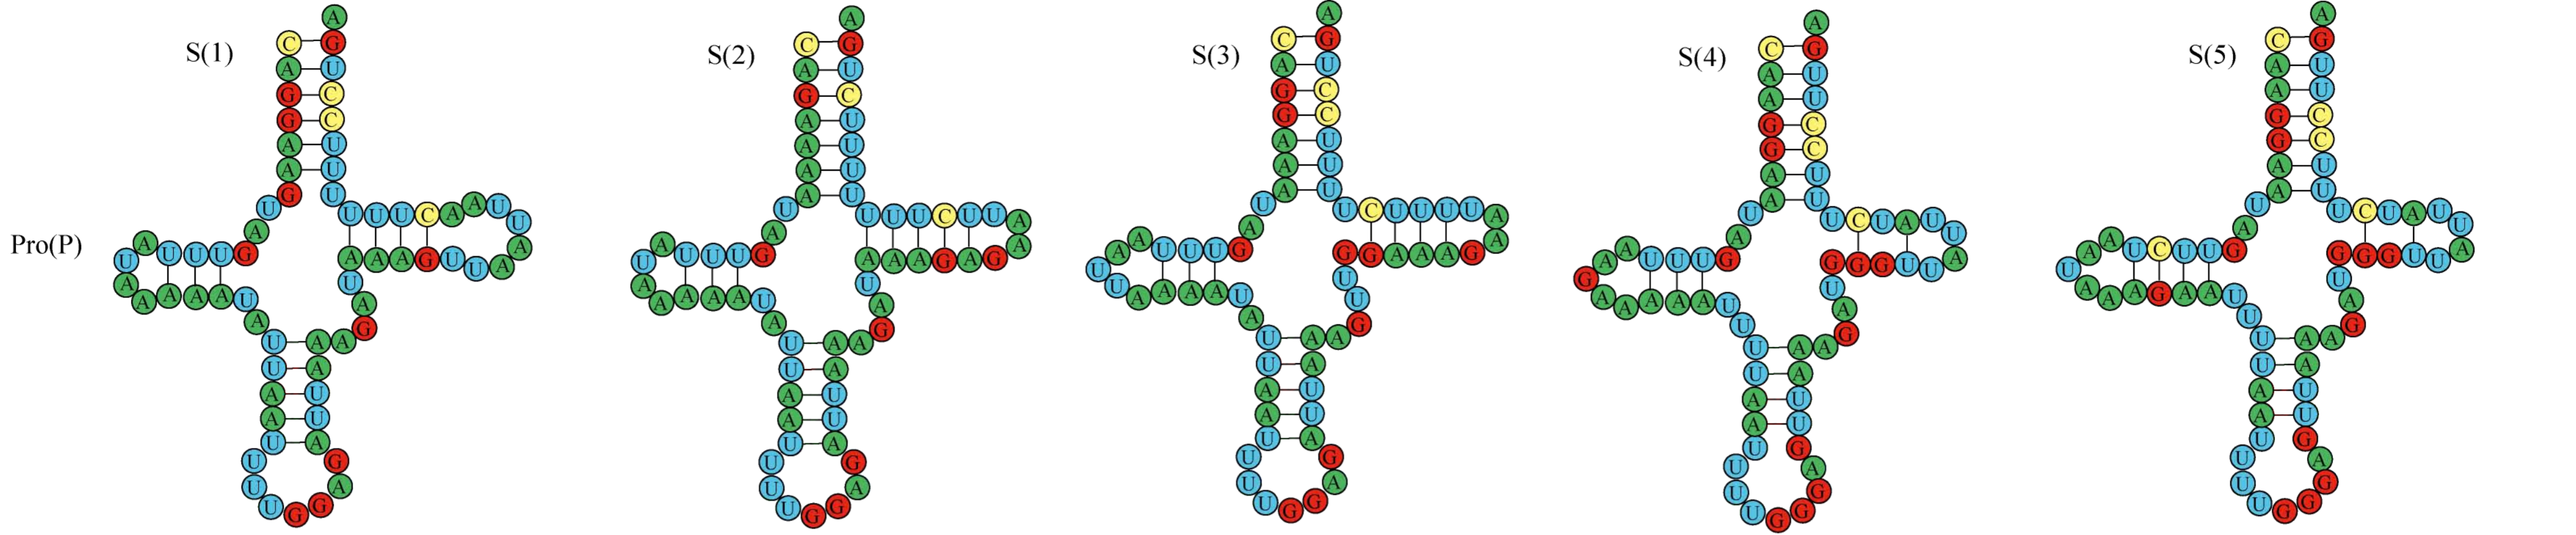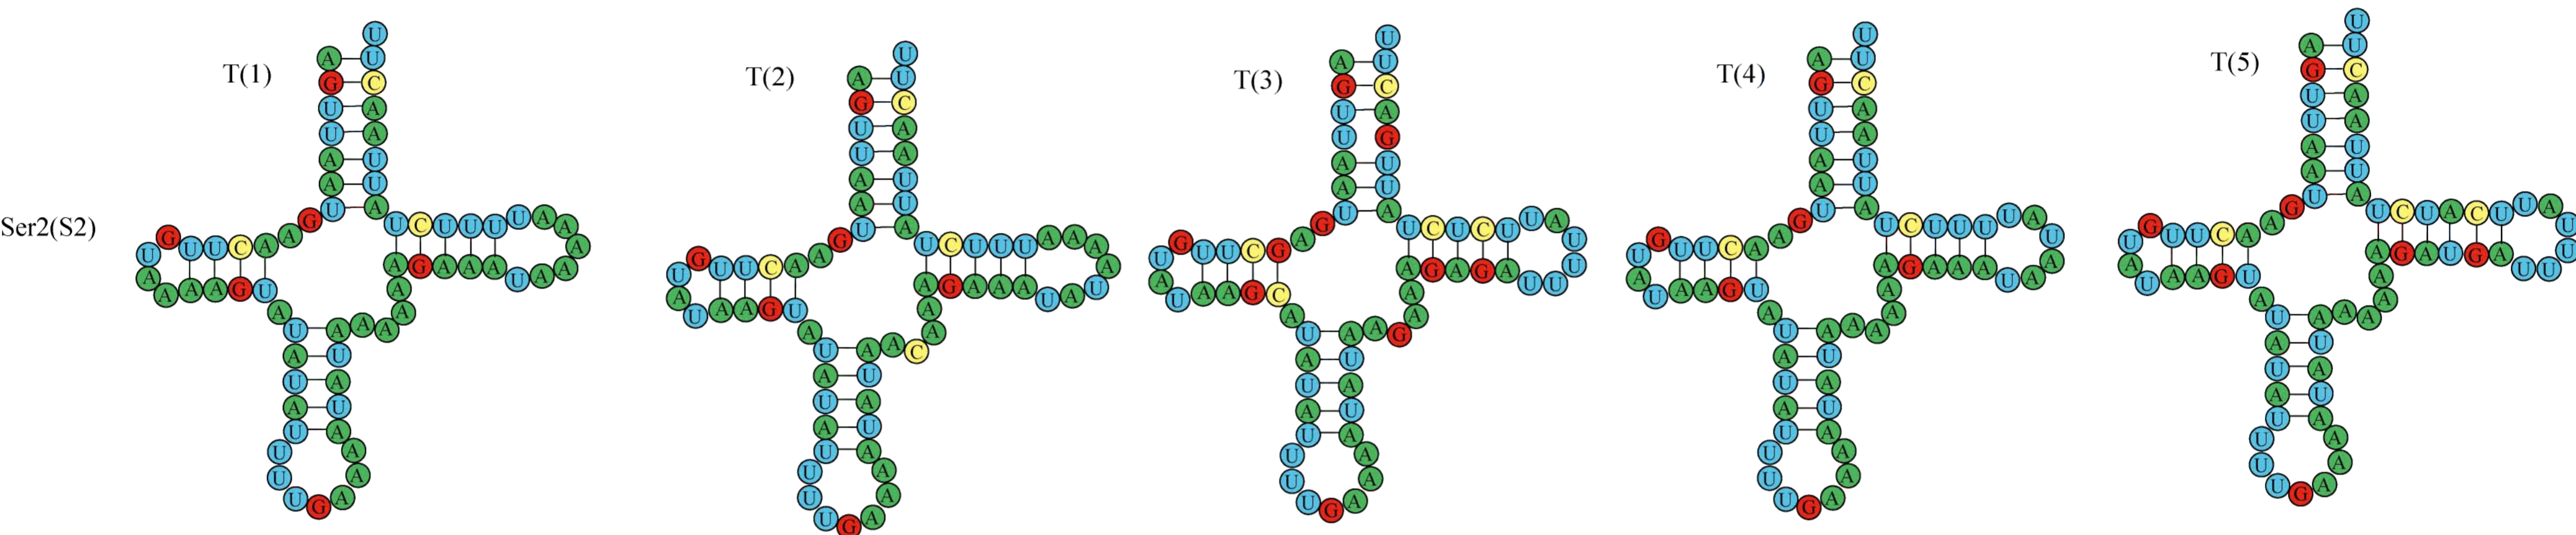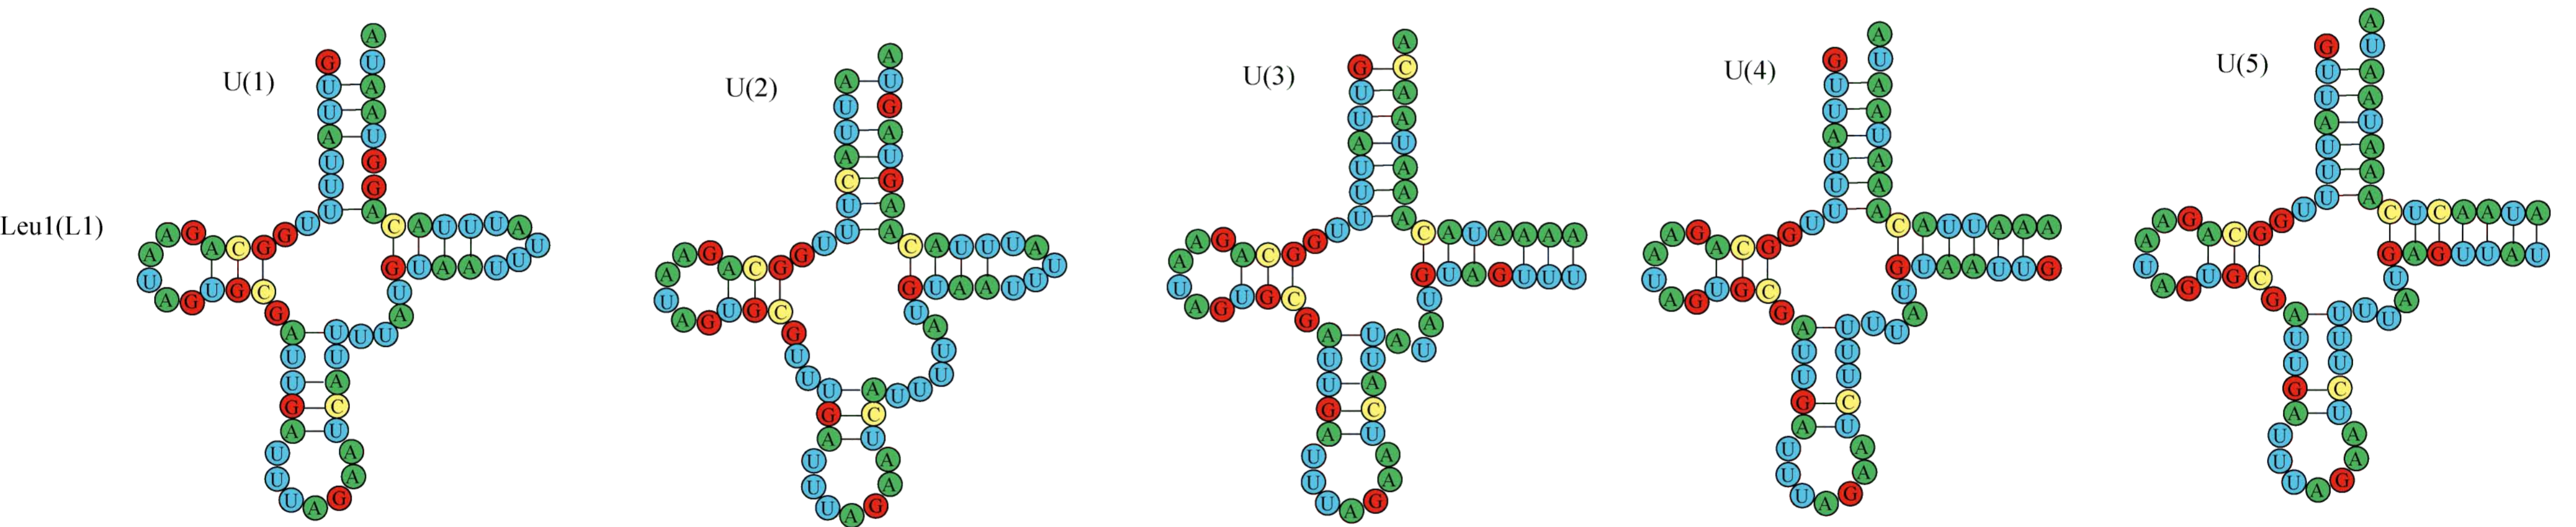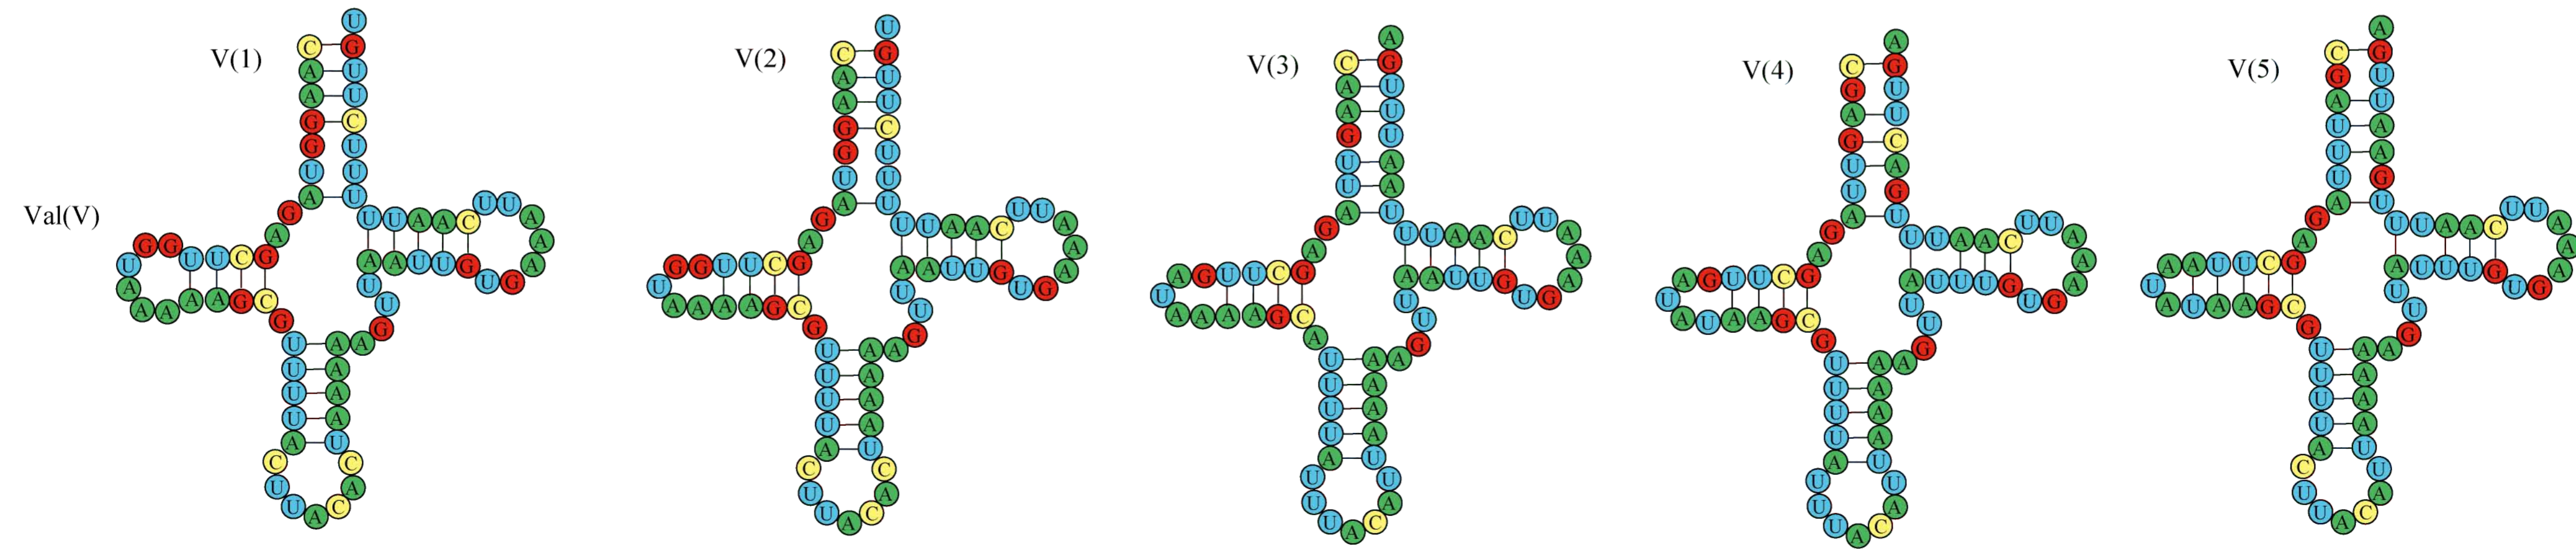

Supplement: peerj-07-7633-s007.pdf [file peerj-07-7633-s007.pdf]
